# Supplementary material for: Structural and molecular features of acetylcholinesterase targeting small molecules: leveraging in silico tools to combat Alzheimer's disease
Source: Royal Society of Chemistry journal article supplement (doi:10.1039/d4nj02065k), 2024-01-01
Supplement: d4nj02065k1.pdf [file d4nj02065k1.pdf]

**Structural and molecular features of acetylcholinesterase targeting small molecules:  
Leveraging in-silico tools to combat Alzheimer's disease**

Ashanul Haque,<sup>1</sup> Khalaf M. Alenezi,<sup>1</sup> Mohd. Saeed Maulana Abdul Rasheed<sup>2</sup>

<sup>1</sup> Department of Chemistry, College of Science, University of Hail, Kingdom of Saudi Arabia.

<sup>2</sup> Department of Biology, College of Science, University of Hail, Kingdom of Saudi Arabia.

*Supplementary information*

Corresponding: [a.haque@uoh.edu.sa](mailto:a.haque@uoh.edu.sa); [haque\\_chem@yahoo.com](mailto:haque_chem@yahoo.com)

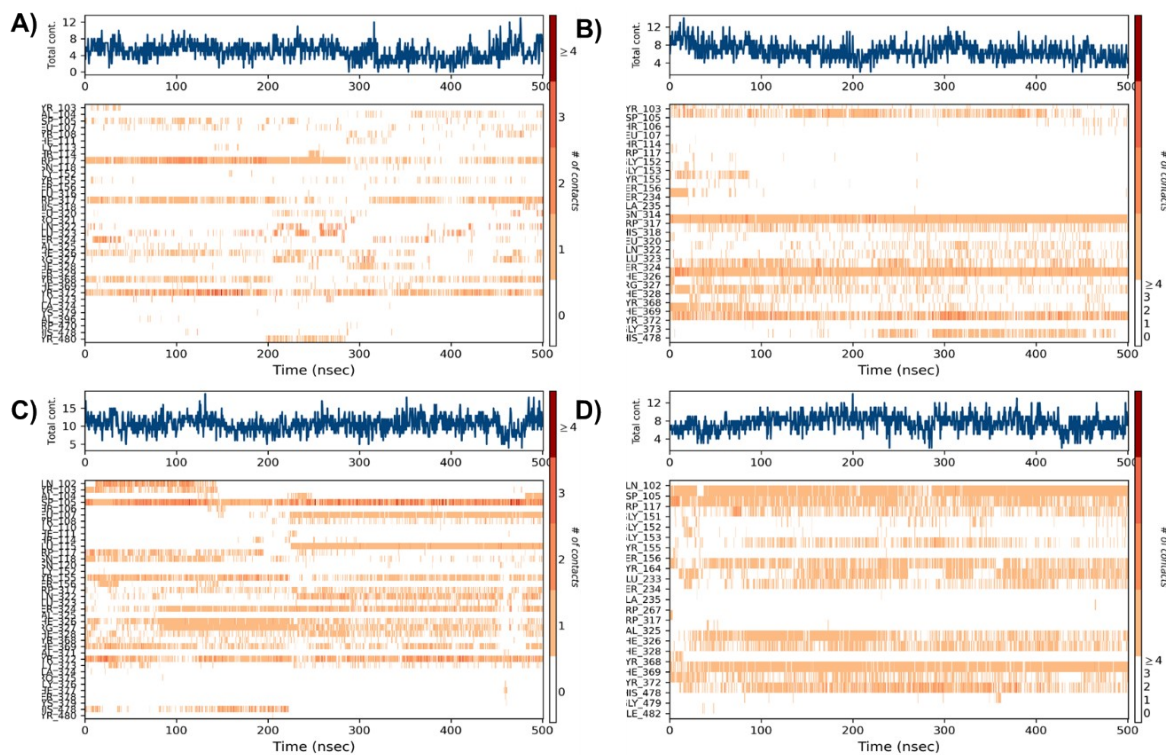

**Figure SF1:** Interactions and contacts formed between the compounds and hAChE complexes in a timeline format during the 500 ns MD simulation. The protein-ligand contacts of (A) donepezil, (B) 73058259, (C) 141100002, and (D) 44285707.

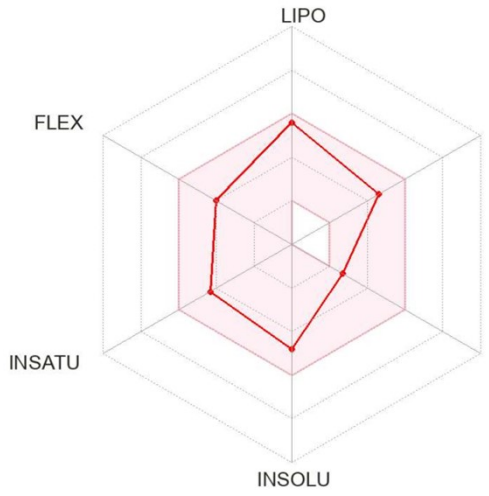

**(a)**

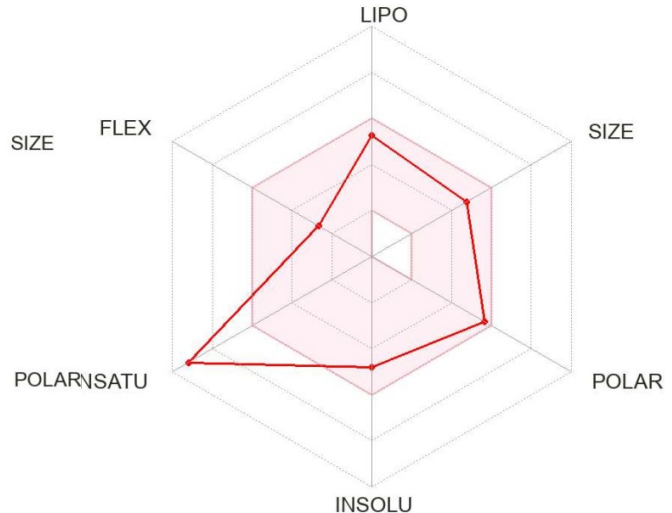

**(b)**

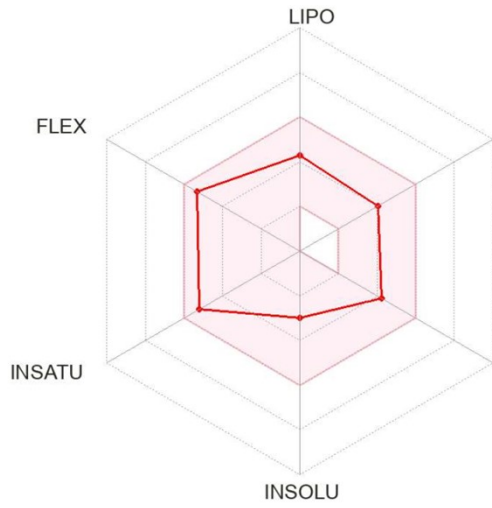

**(c)**

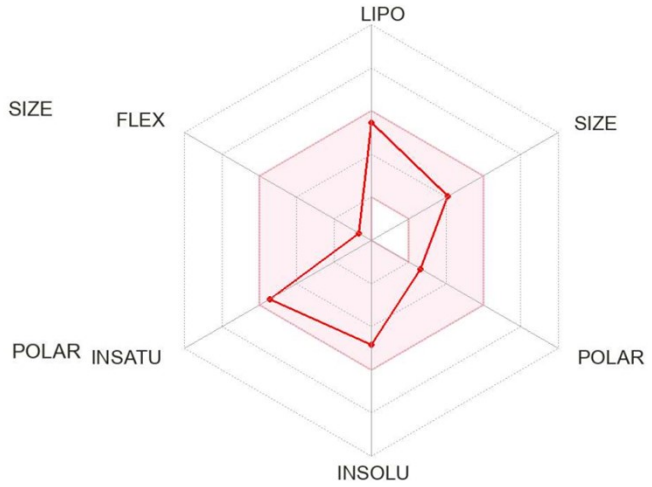

**(d)**

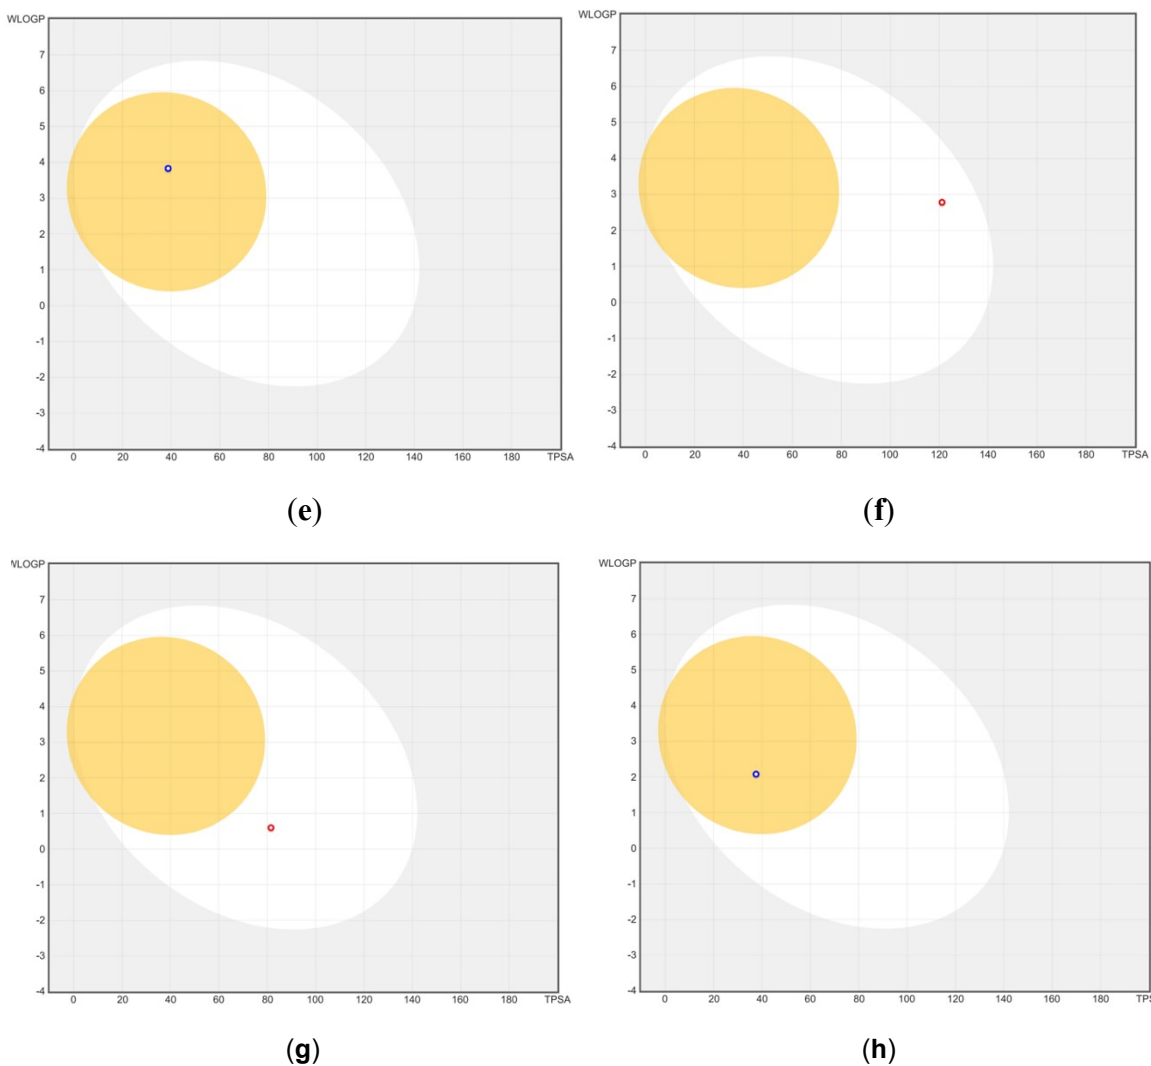

**Figure SF2:** Predicted radar plots and Brain Or Intestinal EstimatedD permeation (BOILED)-Egg diagram. Plots were obtained using the SwissADME web tool and the result of donepezil (a/e), 73058259 (b/f), 141100002 (c/g) and 44285707 (d/h) are shown. Typical values for a molecule to fall the pink area are as follows: lipophilicity =  $-0.7$  to  $+5.0$ ; size:  $150 \text{ g/mol} < \text{molecular weight} < 500 \text{ g/mol}$ ; polarity:  $20 \text{ \AA}^2 < \text{topological polar surface area (TPSA)} < 130 \text{ \AA}^2$ ; insolubility:  $0 < \text{LogS} < 6$ ; and INSATU (insaturation):  $0.25 < \text{fraction of carbons in } sp^3 \text{ hybridization} < 1$ ; and flexibility:  $0 < \text{number of rotatable bonds} < 9$ .

**Table ST1:** SMILES strings of the reference and identified compounds.

| <b>Comp.</b>  | <b>SMILES</b>                                                              |
|---------------|----------------------------------------------------------------------------|
| Donepezil     | <chem>O=C1C(CC2=CC(OC)=C(OC)C=C21)CC3CCN(CC3)CC4=CC=CC=C4</chem>           |
| 73058259      | <chem>O=C1C2=C(C=C(COC(C3=CC=C(O)C=C3)=O)C=C2O)C(C4=CC=CC(O)=C41)=O</chem> |
| 14110000<br>2 | <chem>O=C(C(C)(C)O)C(C=C1)=CC=C1C([NH2+])CCC[NH3+]C2=CC=CC=C2</chem>       |
| 44285707      | <chem>OC1=CC(C23CC(C(C([NH+](C)CC3)C2)=C4)=NC5=C4C=CC=C5)=CC=C1</chem>     |

**Table ST2:** The drug-likeness properties of the shortlisted compounds.

| Compound  | # Rotatable Bonds | CNS | Mol MW | Dipole | SASA   | FOSA   | FISA   | PISA   | Volume  | HBD | HBA  | PSA    | RO5 |
|-----------|-------------------|-----|--------|--------|--------|--------|--------|--------|---------|-----|------|--------|-----|
| Donepezil | 6                 | 1   | 379.49 | 3.54   | 714.44 | 415.7  | 46.23  | 252.47 | 1282.94 | 0   | 5.5  | 50.15  | 0   |
| 141100002 | 10                | 0   | 326.44 | 4.92   | 661.09 | 257.96 | 133.80 | 269.33 | 1159.48 | 4   | 5.25 | 81.60  | 0   |
| 44285707  | 1                 | 1   | 330.43 | 2.83   | 602.22 | 194.04 | 71.18  | 336.99 | 1070.21 | 1   | 3.75 | 39.22  | 0   |
| 73058259  | 6                 | -2  | 390.35 | 3.18   | 663.28 | 34.29  | 271.39 | 357.60 | 1158.13 | 1   | 6.25 | 150.75 | 0   |

**Table ST3:** The ADMET properties of the selected compounds were assessed.

| Title     | QPpolrz | QPlog PC16 | QPlog Poct | QPlog Pw | QPlog Po/w | QPlog S | CIQP logS | QPlog HERG | QPP Caco | QPlog BB | QPPM DCK | QPlog Kp | QPlog Khsa | %HOA   |
|-----------|---------|------------|------------|----------|------------|---------|-----------|------------|----------|----------|----------|----------|------------|--------|
| Donepezil | 43.748  | 12.287     | 17.068     | 7.564    | 4.435      | -4.68   | -4.338    | -6.711     | 900.253  | 0.118    | 488.543  | -2.969   | 0.616      | 100    |
| 141100002 | 36.399  | 12.74      | 20.654     | 12.876   | 2.42       | -2.351  | -2.158    | -7.386     | 33.18    | -0.61    | 15.253   | -6.202   | 0.105      | 68.337 |
| 44285707  | 39.252  | 11.258     | 16.498     | 8.883    | 3.80       | -4.504  | -4.365    | -6.451     | 522.124  | 0.23     | 271.129  | -3.611   | 0.765      | 100    |
| 73058259  | 39.757  | 13.641     | 18.787     | 11.891   | 2.47       | -5.077  | -5.849    | -6.407     | 26.444   | -2.56    | 9.752    | -4.685   | 0.277      | 66.839 |
